# Supplementary material for: Genetic diversity of Staphylococcus aureus wall teichoic acid glycosyltransferases affects immune recognition
Source: PubMed Central journal article supplement (PMC9837562; doi:10.1099/mgen.0.000902), 2022-12-07
Supplement: mgen-8-902-s001.pdf [file mgen-8-902-s001.pdf]

## **Genetic diversity of *Staphylococcus aureus* wall teichoic acid glycosyltransferases affects immune recognition**

Sara M. Tamminga, Simon L. Völpel, Kim Schipper, Thilo Stehle, Yvonne Pannekoek and Nina M. van Sorge

### **Supplementary Material**

List of materials included:

- Tables S1-S4
- Figures S1-S4

**Supplementary Table 1.** Bacterial strains used in this study

| Strain (sequence type, clonal complex)                                 | Source     |
|------------------------------------------------------------------------|------------|
| RN4220 $\Delta tarM\Delta tarS$ (ST8, CC8)                             | (19)       |
| RN4220 $\Delta tarM\Delta tarS$ +pRB474- <i>tarS</i>                   | (19)       |
| RN4220 $\Delta tarM\Delta tarS$ +pRB474- <i>tarM</i>                   | (19)       |
| RN4220 $\Delta tarM\Delta tarS$ +pRB474- <i>tarP</i>                   | (6)        |
| RN4220 $\Delta tarM\Delta tarS$ +pRB474- <i>tarS</i> -D91A             | This study |
| RN4220 $\Delta tarM\Delta tarS$ +pRB474- <i>tarS</i> -D91H             | This study |
| RN4220 $\Delta tarM\Delta tarS$ +pRB474- <i>tarS</i> -E177A            | This study |
| RN4220 $\Delta tarM\Delta tarS$ +pRB474- <i>tarS</i> -E177K            | This study |
| RN4220 $\Delta tarM\Delta tarS$ +pRB474- <i>tarS</i> -S212A            | This study |
| RN4220 $\Delta tarM\Delta tarS$ +pRB474- <i>tarS</i> -S212R            | This study |
| RN4220 $\Delta tarM\Delta tarS$ +pRB474- <i>tarS</i> -p124 Stop codon  | This study |
| RN4220 $\Delta tarM\Delta tarS$ +pRB474- <i>tarS</i> -p625 Stop codon  | This study |
| RN4220 $\Delta tarM\Delta tarS$ +pRB474- <i>tarS</i> -p892 Stop codon  | This study |
| RN4220 $\Delta tarM\Delta tarS$ +pRB474- <i>tarS</i> -p1063 Stop codon | This study |
| RN4220 $\Delta tarM\Delta tarS$ +pRB474- <i>tarM</i> -G17D             | This study |
| RN4220 $\Delta tarM\Delta tarS$ +pRB474- <i>tarP</i> -T10P             | This study |

**Supplementary Table 2.** Origin of wild-type pRB474 *tar*-gene inserts

| Gene on plasmid RB474 | Strain of origin        | Source | PubMLST allele |
|-----------------------|-------------------------|--------|----------------|
| <i>tarS</i>           | <i>S. aureus</i> RN4220 | (19)   | 16             |
| <i>tarM</i>           | <i>S. aureus</i> RN4220 | (19)   | 1              |
| <i>tarP</i>           | <i>S. aureus</i> N315   | (6)    | 1              |

**Supplementary Table 3.** Primers used in this study

| Primer | Target                    | Sequence (5' to 3')                                          |
|--------|---------------------------|--------------------------------------------------------------|
| #018   | Plasmid RB474 RV          | CTCAAGCTAGAGAGTCATTACCC                                      |
| #019   | Plasmid RB474 FW          | CTGGATTGTTCAGAACGCTCG                                        |
| #015   | TarS RV 1                 | CTACACGTTCTGGAAGTCTTG                                        |
| #016   | TarS FW 2                 | GGCATTGATATCGCTAAGCC                                         |
| #030   | TarS FW 1                 | GTGAACATATGAGTAGTGC GTA                                      |
| #046   | Mutagenesis TarS D91A FW  | ATTATTTGTGG <b>CCTCCGAT</b> <sup>1</sup>                     |
| #047   | Mutagenesis TarS D91A RV  | CATCGGAG <b>GCCACAAA</b>                                     |
| #040   | Mutagenesis TarS D91H FW  | GTATTATTTGTG <b>CACTCCGATG</b>                               |
| #041   | Mutagenesis TarS D91H RV  | GTCATCGGAGT <b>GCACAAA</b>                                   |
| #028   | Mutagenesis TarS E177K FW | CCAGAAGAATTAAGAGTGCA <b>AAAGATCAATTATTTACAATGAAAGC</b>       |
| #029   | Mutagenesis TarS E177K RV | GCTTTCATTGTAATAATTGATCTTT <b>GCACTCTTAATTCTTCTGG</b>         |
| #054   | TarM RV 1                 | GCCACTTCAATAAGCAAATC                                         |
| #053   | TarM FW 2                 | GGGATACCCATATATTTCAAG                                        |
| #097   | TarM FW 4                 | ATGAAAAAATATTTATGATGGTACATG                                  |
| #058   | TarP RV 1                 | GTAGCAAAATATTGATTTCTCG                                       |
| #057   | TarP FW 2                 | GCGATTTAATAATTGGAAAATATG                                     |
| #094   | pRB474                    | GTTATTGTCTCATGAGCGGATA                                       |
| #099   | TarP RV                   | TATCAGCTTTGCTACATTTCC                                        |
| #087   | gBlock all FW             | GCGTTTAAACTT <b>GGATCC</b> AAAGGAGGTATTATAATGAT <sup>2</sup> |
| #088   | gBlock S212R/A RV         | GATGGGCCCTTGGT <b>CGTACG</b> AGAAAAACTAAAATGACGAT            |
| #105   | gBlock p124 RV            | GATGGGCCCTTGGT <b>GAATTC</b> TTATTTATTTAGCGAGTAA             |
| #106   | gBlock p625 RV            | GATGGGCCCTTGGT <b>GAATTC</b> TTATTTAGCGAGTAAGTCA             |
| #107   | gBlock p892/p1063 RV      | GATGGGCCCTTGGT <b>GAATTC</b> TTTAGTGATAAGTGATATG             |
| #100   | gBlock TarM G17D FW       | GCGTTTAAACTT <b>GGATCC</b> AAAGGAGGTATTATAATGAA              |
| #101   | gBlock TarM G17D RV       | GATGGGCCCTTGGT <b>GGTACC</b> ATTCTAGAAATATGACCTACG           |
| #103   | gBlock TarP T10P FW       | GCGTTTAAACTT <b>GGATCC</b> ATGAAAAAGTAAGTGTTAT               |
| #104   | gBlock TarP T10P RV       | GATGGGCCCTTGGT <b>TTCGAA</b> ATTCATCAAAAATTCTATAGT           |
| #109   | TarS-p124 FW              | TGAAAGGTGTCAATGGTCGTGG                                       |
| #110   | TarS-p124 RV              | CGTTGATTACCAACACGCACTTC                                      |
| #111   | TarS-p625 FW              | GAATGCAAATCGAATCAGTGTG                                       |
| #112   | TarS-p1063 FW             | GATTGGCGAAGGACATTATGAT                                       |

<sup>1</sup>All nucleotide substitutions are indicated in bold. <sup>2</sup>Restriction digestion sites are underlined.

**Supplementary Table 4.** Number (%) of *tar*-enzymes present in different clonal complexes

| <b>CC</b>    | <b><i>tarS</i></b>   | <b><i>tarM</i></b>  | <b><i>tarP</i></b>  |
|--------------|----------------------|---------------------|---------------------|
| CC1          | 1,030 (4.0%)         | 424 (4.5%)          | 49 (2.7%)           |
| CC5          | 5,761 (22.6%)        |                     | 1,205 (67.3%)       |
| CC7          | 49 (0.2%)            |                     | 2 (0.1%)            |
| CC8          | 6,661 (26.2%)        | 6,600 (69.5%)       | 15 (0.8%)           |
| CC12         | 60 (0.2%)            | 2 (0.02%)           | 2 (0.1%)            |
| CC15         | 436 (1.7%)           | 398 (4.2%)          | 3 (0.2%)            |
| CC22         | 5,093 (20.0%)        |                     |                     |
| CC25         | 96 (0.4%)            |                     |                     |
| CC30         | 1,383 (5.3%)         | 1,351 (14.2%)       | 3 (0.2%)            |
| CC45         | 584 (2.3%)           |                     | 38 (2.1%)           |
| CC59         | 154 (0.6%)           |                     | 2 (0.1%)            |
| CC88         | 111 (0.4%)           |                     | 5 (0.3%)            |
| CC93         | 446 (1.8%)           | 446 (4.7%)          |                     |
| CC97         | 300 (1.2%)           |                     | 12 (0.7%)           |
| CC121        | 132 (0.5%)           | 108 (1.1%)          |                     |
| CC130        | 465 (1.8%)           |                     |                     |
| CC133        | 247 (1.0%)           |                     |                     |
| CC398        | 1,347 (5.3%)         |                     | 397 (22.2)          |
| CC425        | 141 (0.6%)           |                     | 2 (0.1%)            |
| Unknown      | 970 (3.8%)           | 162 (1.7%)          | 56 (3.1%)           |
| <b>Total</b> | <b>25,466 (100%)</b> | <b>9,491 (100%)</b> | <b>1,791 (100%)</b> |

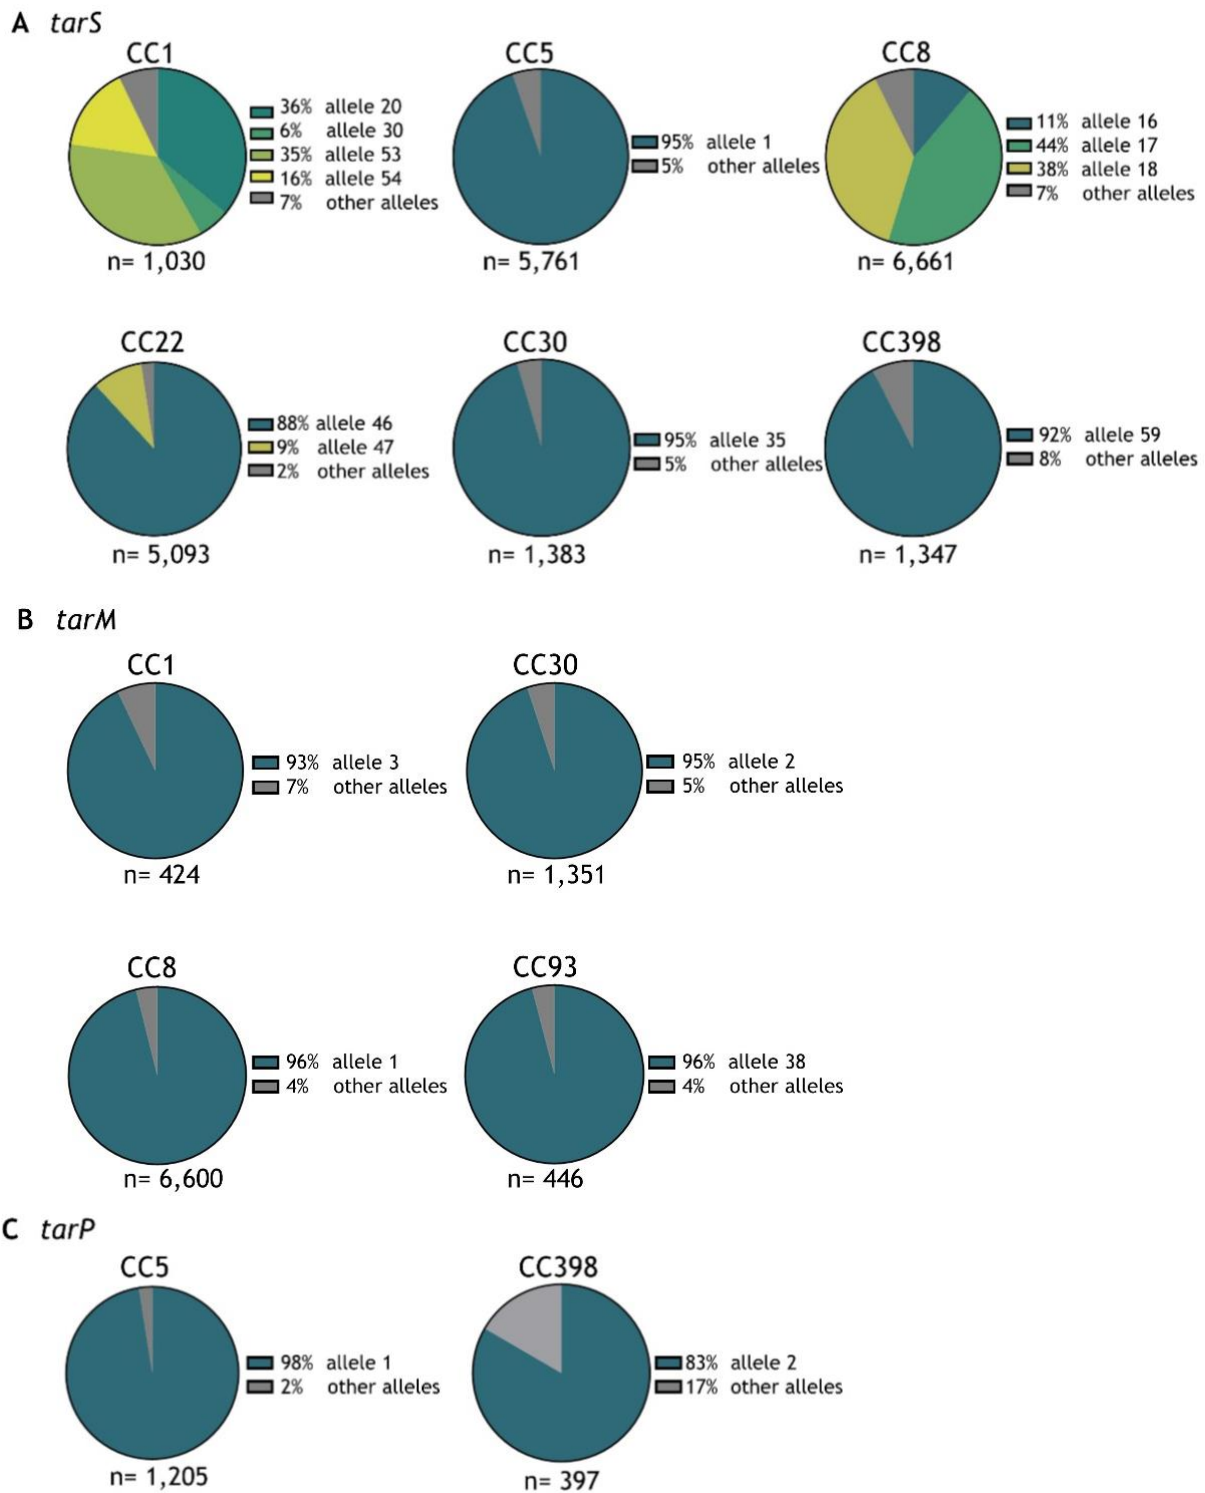

**Supplementary Figure 1. Distribution and occurrence of *tar* alleles within different clonal complexes.**

(A) The most frequently observed *tarS* alleles in distinct clonal complexes (CCs that comprise >4% of total isolates are depicted). (B) Same as in (A) but for *tarM*. (C) Same as in (A) but for *tarP*.

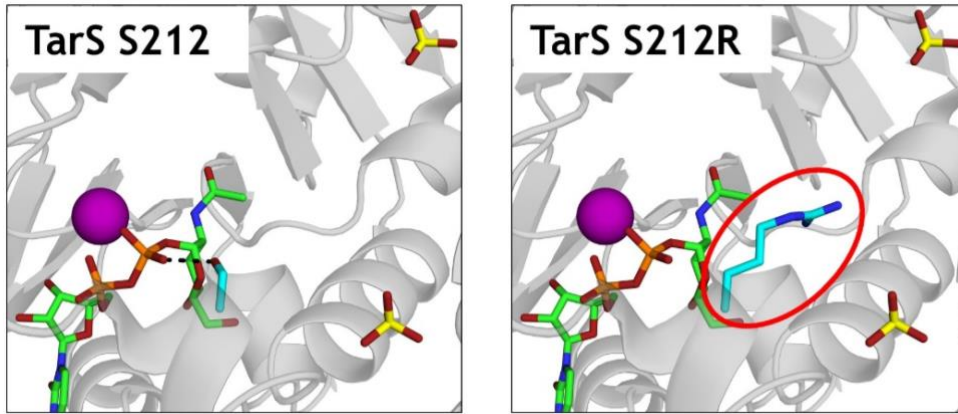

**Supplementary Figure 2. PyMOL visualizations of TarS S212 and S212R.** TarS is shown in grey cartoon presentation (PDB code 5TZE). The donor substrate UDP-GlcNAc (green) and the residues of interest: S212 (left) and the substitution S212R (right, red circled), both in cyan, are all displayed in stick form. Sulfates are indicated in yellow.

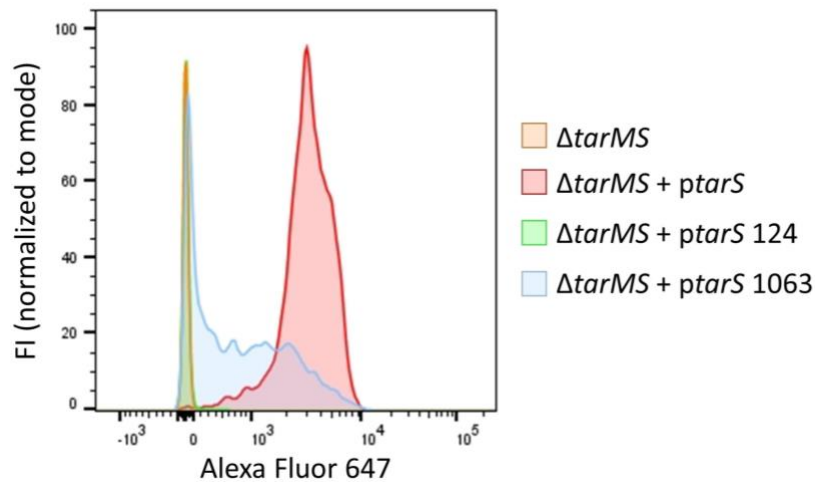

**Supplementary Figure 3. Representative flow cytometry histogram.** Raw flow cytometry data corresponding to Figure 5A. Binding of monoclonal Fab fragments specific to  $\beta$ -GlcNAc-WTA (4497) to *S. aureus* RN4220  $\Delta tarMS$  complemented with plasmid-expressed WT *tarS* or premature stop codon 124 or 1063. Histogram of fluorescent intensity (FI) normalized to mode for secondary antibody (Goat F(ab')<sub>2</sub> anti-human Kappa-Alexa Fluor 647) is shown.

### Mutations in *tar* gene

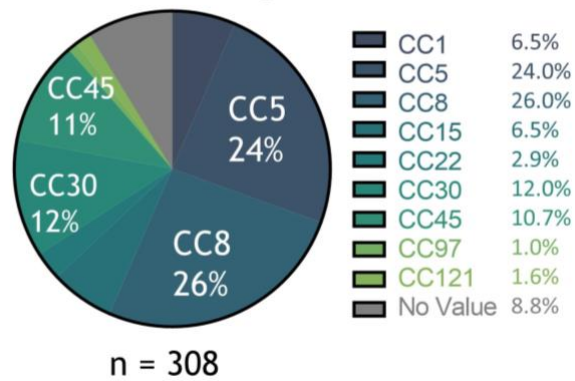

**Supplementary Figure 4. Overview of CC distribution of isolates that contain an amino acid substitution or a premature stopcodon in a *tar* gene.** CC distribution of the 308 isolates that were identified containing an amino acid substitution in a critical residue or a premature stopcodon in one of the *tar* enzymes.
